# Supplementary material for: Identification of photocrosslinking peptide ligands by mRNA display
Source: PubMed Central journal article supplement (PMC10232439; doi:10.1038/s42004-023-00898-2), 2023-05-31
Supplement: 42004_2023_898_MOESM2_ESM.pdf [file 42004_2023_898_MOESM2_ESM.pdf]

# Description of Additional Supplementary File

**File name:** Supplementary Data 1

**Description:** Illumina sequencing data for recovered libraries from each round of XL-RaPID screening.
